# Supplementary material for: Intratumoral delivery of M-CSF by calcium crosslinked polymer micelles enhances cancer immunotherapy
Source: Royal Society of Chemistry journal article supplement (doi:10.1039/c9bm00226j), 2019-01-01
Supplement: c9bm00226j1.pdf [file c9bm00226j1.pdf]

## **Supplementary Information**

### **Intratumoral Delivery of M-CSF by Calcium Crosslinked Polymer Micelles Enhances Cancer Immunotherapy**

Kuirong Mao, Xiuxiu Cong, Liangzhu Feng, Hongmei Chen, Jialiang Wang, Chenxi  
Wu, Kun Liu, Chunsheng Xiao, Yong-Guang Yang,\* and Tianmeng Sun\*

**\*Email: [tsun41@jlu.edu.cn](mailto:tsun41@jlu.edu.cn) (T. Sun); [yonggg@jlu.edu.cn](mailto:yonggg@jlu.edu.cn) (Y.G. Yang)**

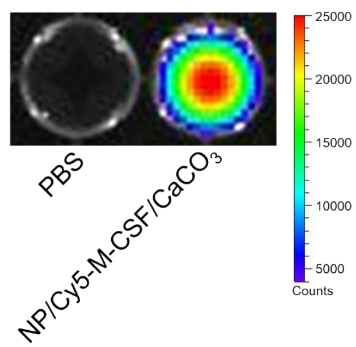

**Figure S1.** The fluorescent image of H<sub>2</sub>O and NP/Cy5-M-CSF/CaCO<sub>3</sub>.

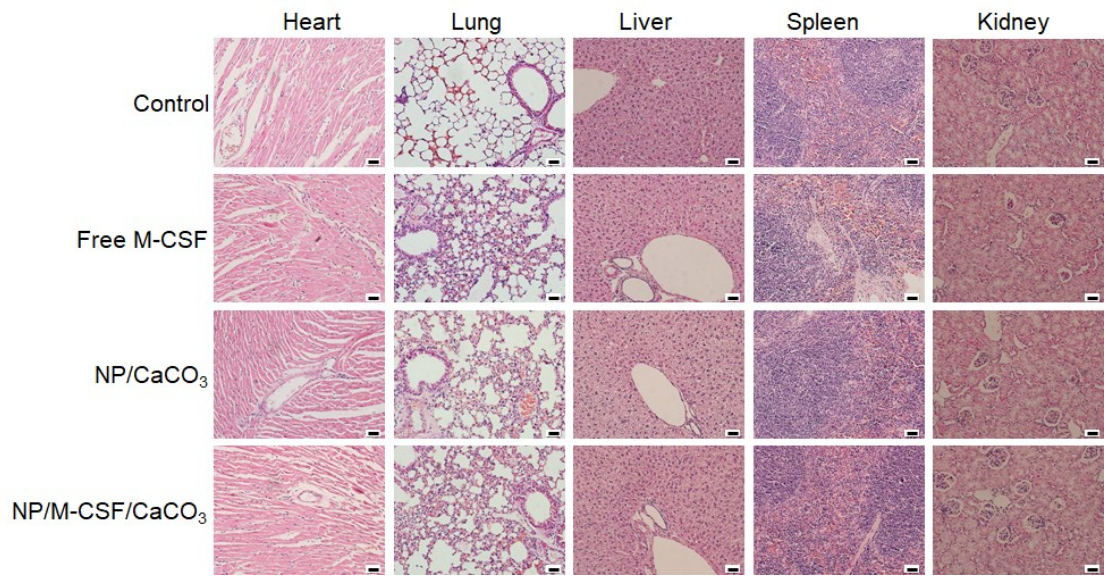

**Figure S2.** Pathological changes in heart, lung, liver, spleen, and kidney of B16 tumor-bearing mice at 24 h after *i.v.* injection of glucose, free M-CSF, NP/CaCO<sub>3</sub>, and NP/M-CSF/CaCO<sub>3</sub> for 7 times. Scale bar = 20 µm.
